# Supplementary material
Source: PubMed Central journal article supplement (PMC2934694)
Supplement: supp_M110.101717_jbc.M110.101717-2.pdf [file supp_M110.101717_jbc.M110.101717-2.pdf]

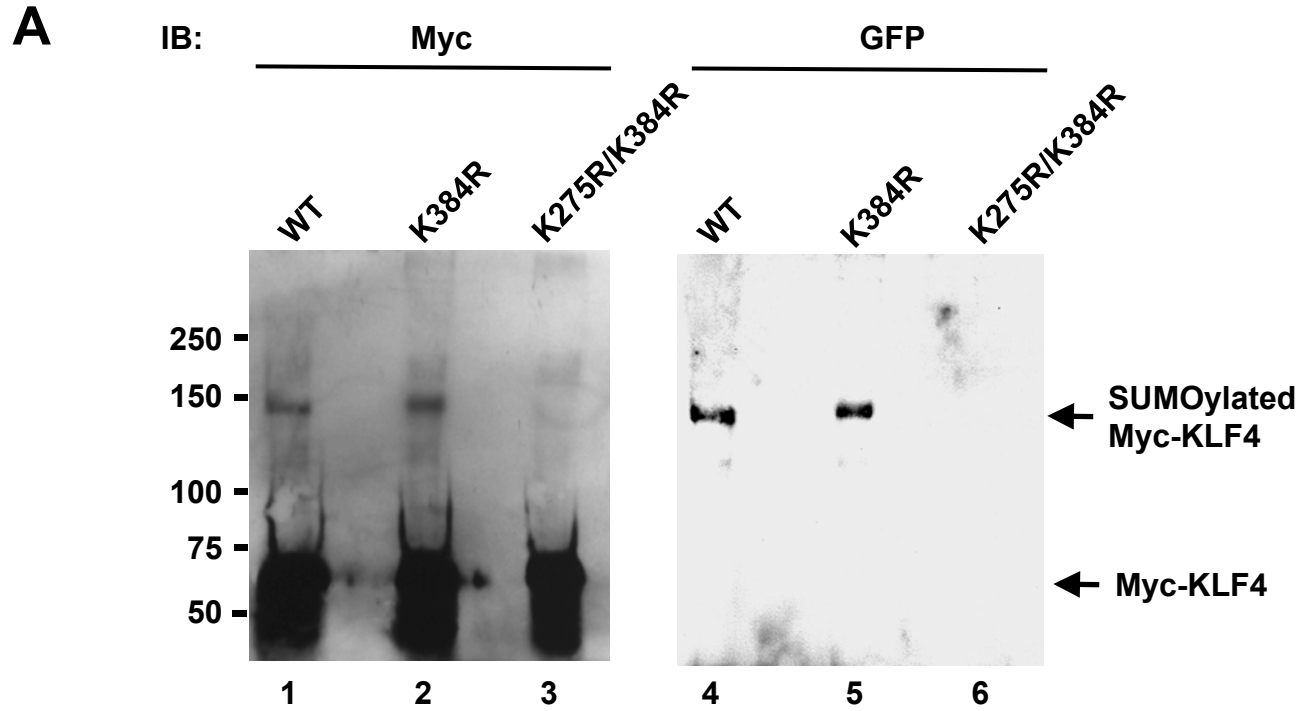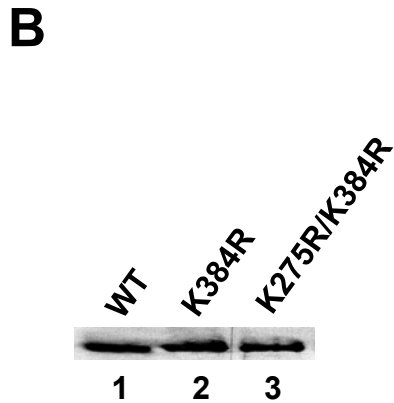

**C**

| MOTIF                  | SPECIES            |
|------------------------|--------------------|
| ←                      |                    |
| 380 <u>PEEPKPK</u> 386 | Mus musculus       |
| 376 <u>PEEPKPK</u> 382 | Homo sapiens       |
| 376 <u>PEEPKPK</u> 382 | Pan troglodytes    |
| 376 <u>PEEPKPK</u> 382 | Macaca mulatta     |
| 379 <u>PEEPKPK</u> 385 | Rattus norvegicus  |
| 374 <u>PEEPKPK</u> 380 | Sus scrofa         |
| 374 <u>PEEPKPK</u> 380 | Bos taurus         |
| 374 <u>PEEPKPK</u> 380 | Ovis aries         |
| 304 <u>PEESKPK</u> 310 | Xenopus tropicalis |
| 326 <u>PEDSKPK</u> 332 | Salmo salar        |
| 306 <u>PEDSKPK</u> 312 | Danio rerio        |

Supplemental Figure 1

|             |                           |
|-------------|---------------------------|
| KLF4 SIM    | RETEEFNDLLDLDFILSNS       |
| TDG SIM1    | PDILTFNLDIVIIGINPGL       |
| TDG SIM2    | KGIERNTDVQEVQYT           |
| Sizn1 SIM2  | DCNVIEIDDSPQDDS           |
| Sizn1 SIM3  | PQDDSDVDVILVEPED          |
| RanBP2 SIM  | DDVLIYEL                  |
| Daxx SIM    | DPEEIVLSDSD               |
| PML SIM     | ASGAGEAEERVVVISSSEDSDA    |
| CENP-E SIM  | EEFETSENMAII              |
| CoREST1 SIM | RERESEDELEEANGNNPIDIEVDQN |
| CoREST1 SIM | RERESEDELEEANGNNPIDIEVDQN |

**A**

HIS-SIM (H)<sub>6</sub> P R E T E E F N D L L D L D F I L S N S  
HIS-EEE (H)<sub>6</sub> P R A T A A F N D L L D L D F I L S N S  
HIS-DD (H)<sub>6</sub> P R E T E E F N D L L A L A F I L S N S  
HIS-LI (H)<sub>6</sub> P R E T E E F N D L A D L D F A L S N S

**B**

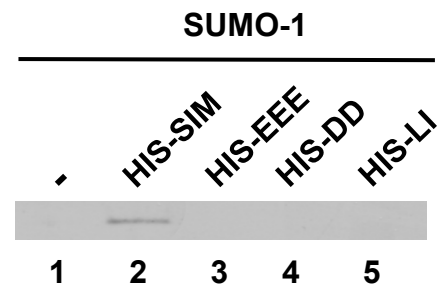

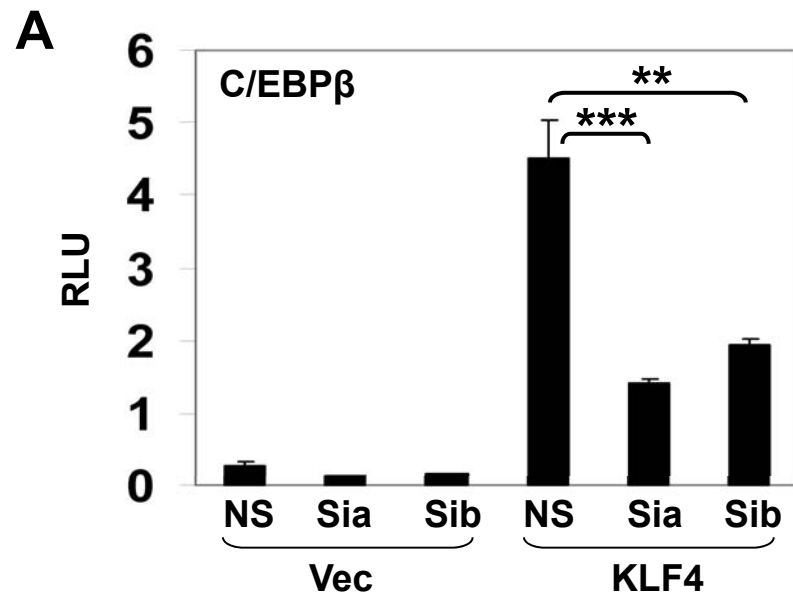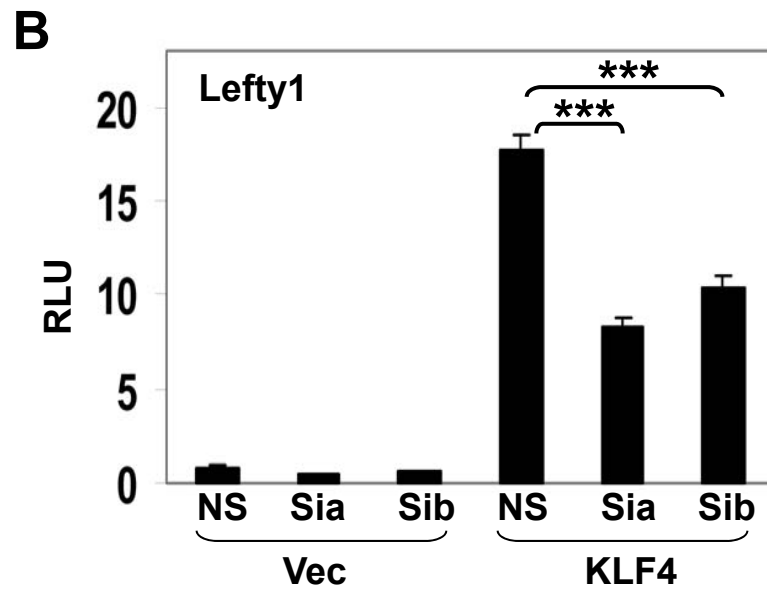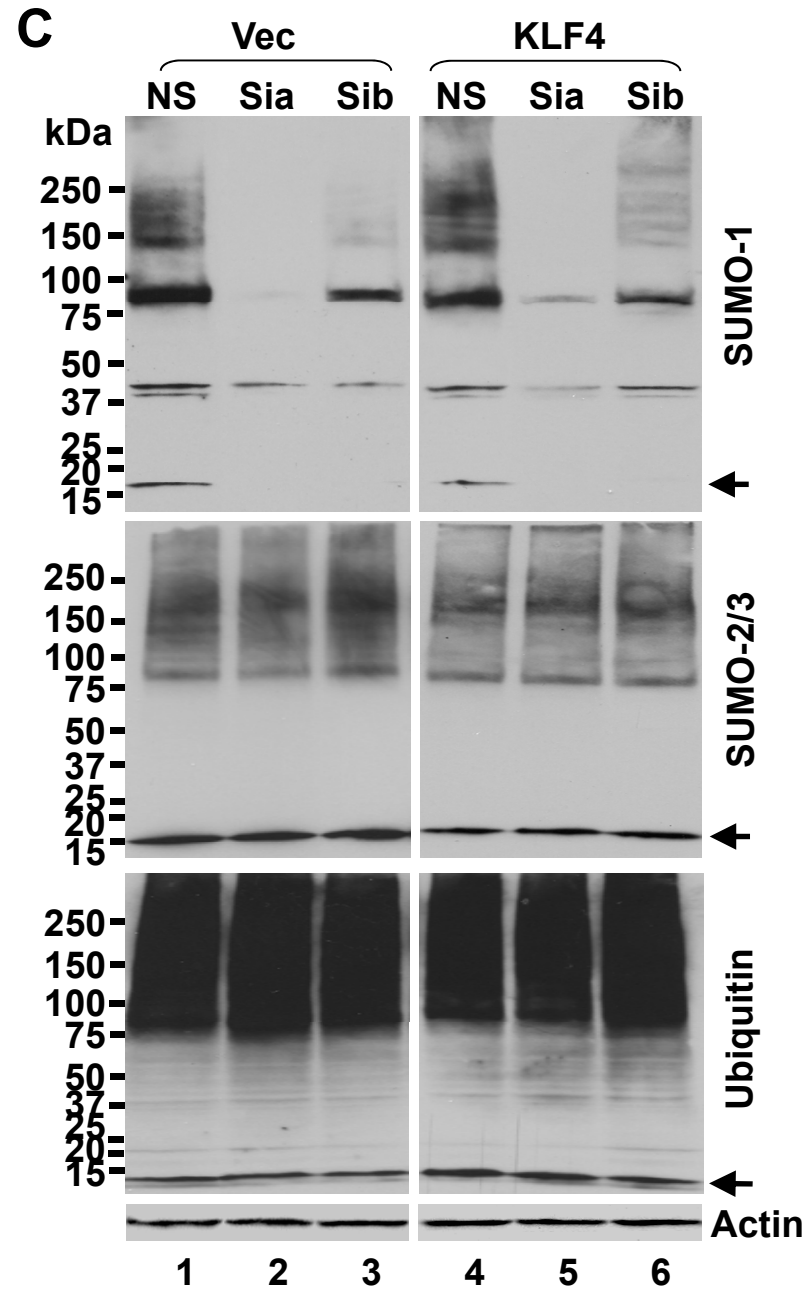

Supplemental Figure 4

**Relative mRNA Levels  
SUMO-1 siRNA/Non-specific siRNA**

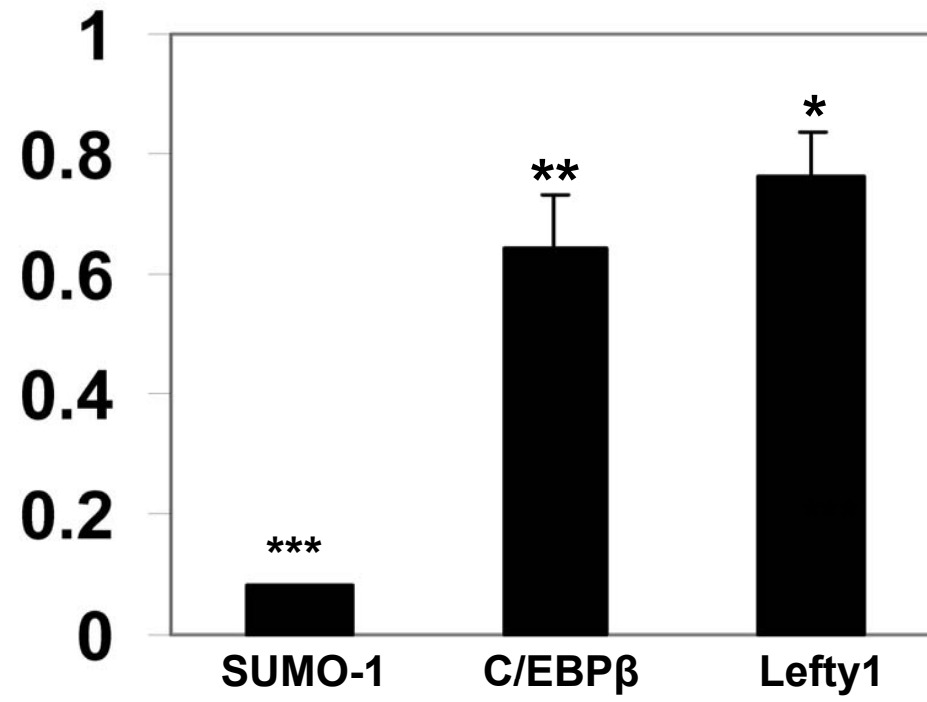

Supplemental Figure 5

# A

**KLF4: RETEEFNLLDLDFILSNS**  
**VP16: DALDDFDLML**  
**AH: ELQELQELQALLQQQ**  
**PPAR $\alpha$ : EADDLESPLSEEFLQEMGNIQEISQSIGEE**  
**Pho4: DSLALDDLDRAFELVEGMDMDWMMP**  
**AvrXa10: VMWEQDAAPFAGAADDFFPAFNEEELAWLMELLPQ**  
**v-Myb: TDEDPEKEKRIKELELLLMSTENEL**

**B**

v-Myb: TDEDPEKEKRIKELELLLMSTENEL

VP16: DALDDFDLDMML

AH: ELQELQELQALLQQQ

AH: ELQELQELQALLQQQ

TDG SIM2: KGIERNTDVQEVQYT

VP16: LMDLDFDDLAD

TDG SIM2: KGIERNTDVQEVQYT

PPAR $\alpha$ : EADDLESPLSEEF LQEMGNIQEISQSIGEE

TDG SIM2: KGIERNTDVQEVQYT

Pho4: DSLALDDLDRAFELVEGMDMDWMMP

TDG SIM2: KGIERNTDVQEVQYT

AvrXa10: EQDAAPFAGAADDFFAPFNEEELAWLMELLPQ

TDG SIM2: KGIERNTDVQEVQYT

v-Myb: TDEDPEKEKR I KELE LLLMSTENEL

TDG SIM2: KGIERNTDVQEVQYT

v-Myb: TDEDPEKEKR I KELE LLLMSTENEL

Hannich *et al.* K-X<sub>3-5</sub>-I/V-I/L-I/L-X<sub>3-5</sub>-D/E/Q/N-D/E-D/E

v-Myb: TDEDPEKEKRIKELELLLMSTENEL

CoREST1 SIM: RERESEDELEEANGNNPIDI EVDQN
